# Supplementary material for: A chimeric porcine reproductive and respiratory syndrome virus 1 strain containing synthetic ORF2-6 genes can trigger T follicular helper cell and heterologous neutralizing antibody responses and confer enhanced cross-protection
Source: Springer Nature journal article supplement (doi:10.1186/s13567-024-01280-3), 2024-03-06
Supplement: MOESM1 [file 13567_2024_1280_MOESM1_ESM.pdf]

**A**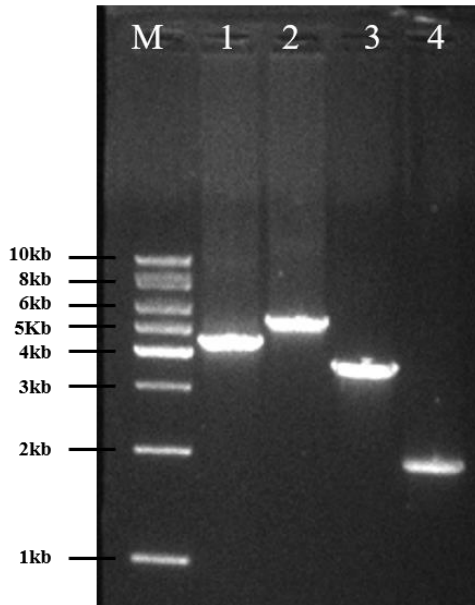**B**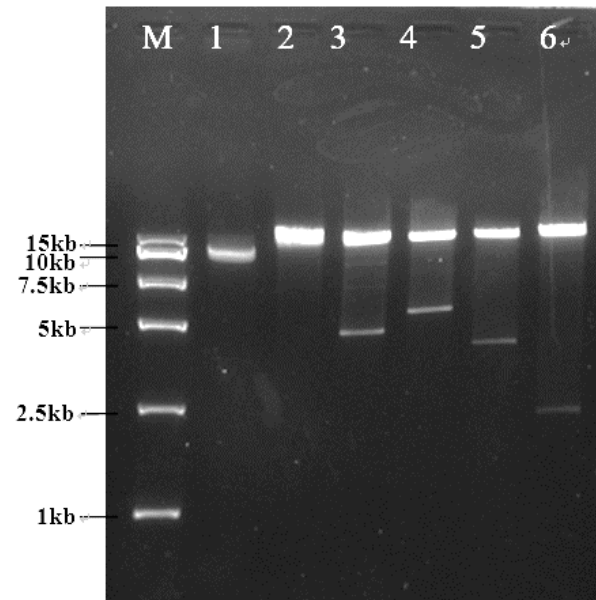

**Additional file 1. Construction of rHLJB1 recombination plasmid.** (A) The four overlapped fragment of the full-length HLJB1 genome were generated by PCR amplification. M: DNA Marker, 1-4: F1-F4 fragments of HLJB1 isolate. (B) The pACYC177-CMV-rHLJB1 recombination plasmid (abbreviated as rHLJB1) was digested with corresponding digestion enzymes to confirm the successful construction of full-length cDNA clone of HLJB1 isolate. M: DNA Marker, 1: rHLJB1 without digestion, 2: rHLJB1 digested with *SgsI*, 3-6: rHLJB1 double-digested with *SgsI*+*Pfl23II*, *Pfl23II*+*BglII*, *BglII*+*Bsp1407I*, *Bsp1407I*+*XbaI*, respectively.
