# Supplementary material for: A chimeric porcine reproductive and respiratory syndrome virus 1 strain containing synthetic ORF2-6 genes can trigger T follicular helper cell and heterologous neutralizing antibody responses and confer enhanced cross-protection
Source: Springer Nature journal article supplement (doi:10.1186/s13567-024-01280-3), 2024-03-06
Supplement: MOESM4 [file 13567_2024_1280_MOESM4_ESM.pdf]

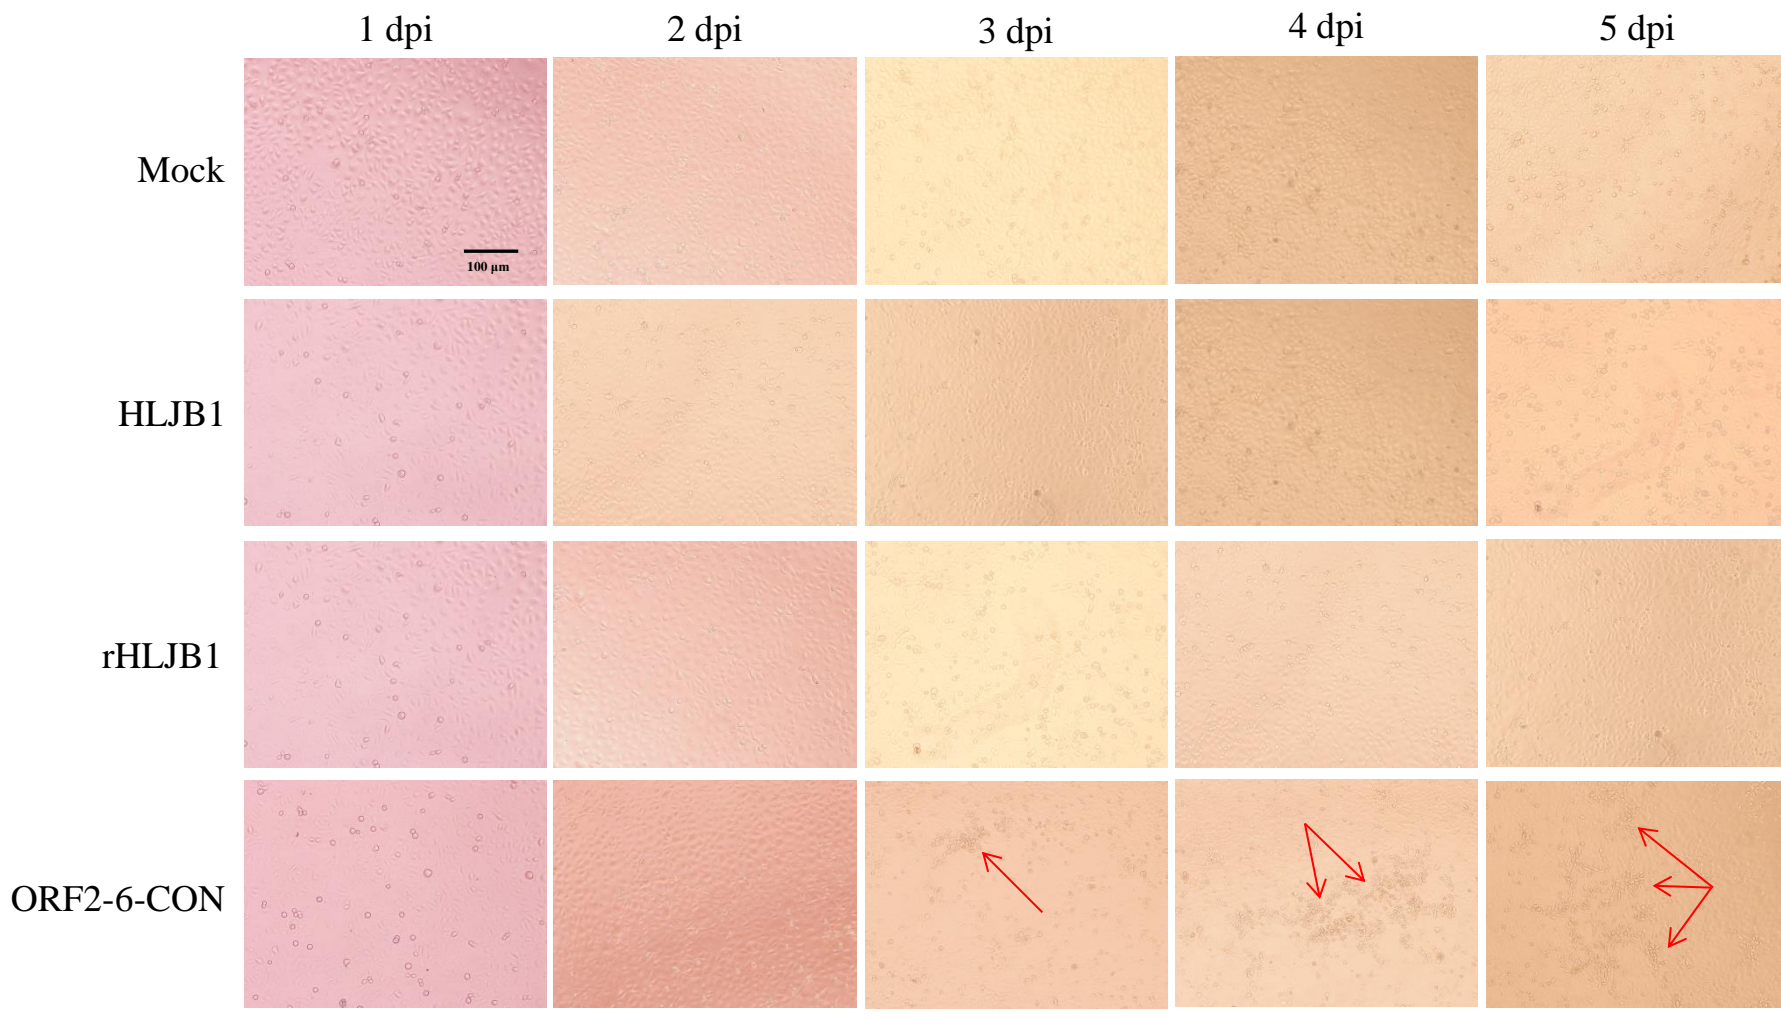

**Marc-145**
